# Supplementary material for: Imidazolidin-2-iminato vanadium complexes for the synthesis of ethylene/propylene/5-ethylidene-2-norbornene (ENB) terpolymers with high ENB incorporation and ultra-high molecular weight
Source: Royal Society of Chemistry journal article supplement (doi:10.1039/d4py00214h), 2024-01-01
Supplement: d4py00214h1.pdf [file d4py00214h1.pdf]

## Supporting Information

For

# Imidazolidin-2-iminato Vanadium Complex for the Synthesis of Ethylene/Propylene/5-ethylidene-2-norbornene (ENB) Terpolymers with High ENB Incorporation and Ultra-high Molecular Weight

Xiao-Yu Zhang,<sup>#</sup> Hao-Liang Li,<sup>#</sup> Bo Xiang, Xiang-Wei Liu, Shu Zhang\* and Yi-Xian Wu\*

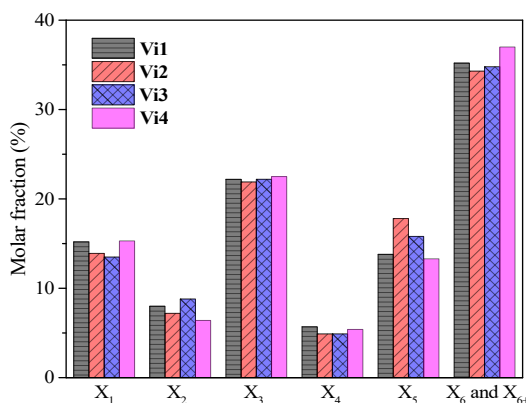

Fig. S1 Molar fraction of uninterrupted methyl sequences in the ethylene-propylene copolymers (Entries 4-7 in Table 1) prepared by using vanadium complexes **Vi1-Vi4** as precatalyst.

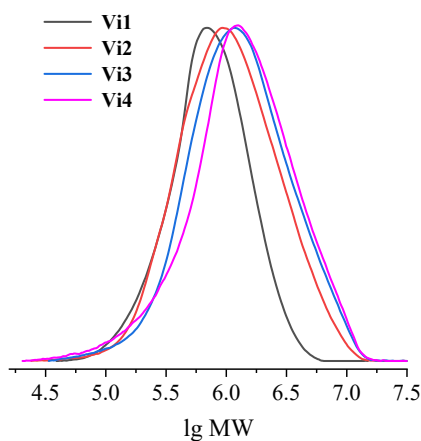

Fig. S2 GPC curves of the resulting ethylene-propylene copolymers (Entries 4-7 in Table 1) by

using vanadium(V) complexes **Vi1-Vi4** as precatalyst.

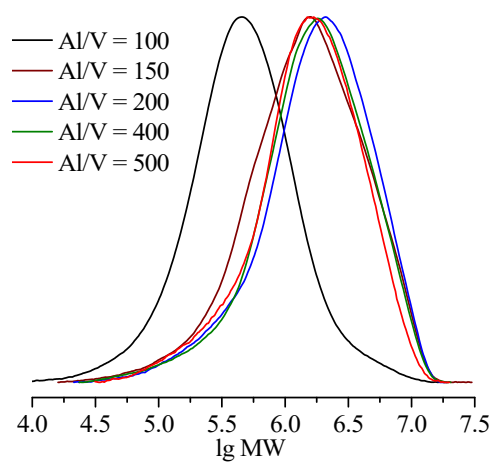

Fig. S3 GPC curves of the resulting ethylene-propylene copolymers (Entries 3, 8-11 in Table 1) with various Al/V molar ratios.
